# Supplementary material
Source: MDPI journal article supplement (https://www.mdpi.com/2673-4079/4/1/9)
Supplement: s1 [file s1]

Supplementary Files

# Utilization of *Azadirachta indica* Sawdust as a Potential Adsorbent for the Removal of Crystal Violet Dye

Zeeshan Ahamad and Abu Nasar \*

Department of Applied Chemistry, Faculty of Engineering and Technology, Aligarh Muslim University, Aligarh 202002, India; shnz6926@gmail.com

\* Correspondence: abunasaramu@gmail.com; Tel.: +91-0571-2700920 (ext. 3000); Fax: +91-0571-2700528

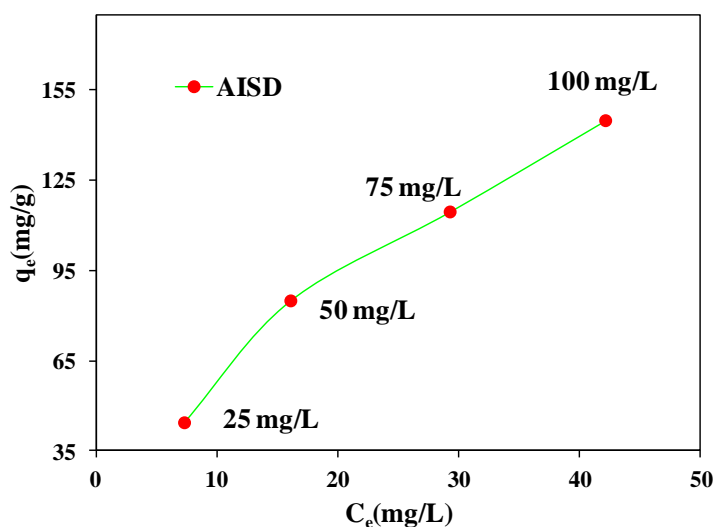

**Figure S1.** The effects of initial dye concentration on the adsorption of CV onto the AISD.

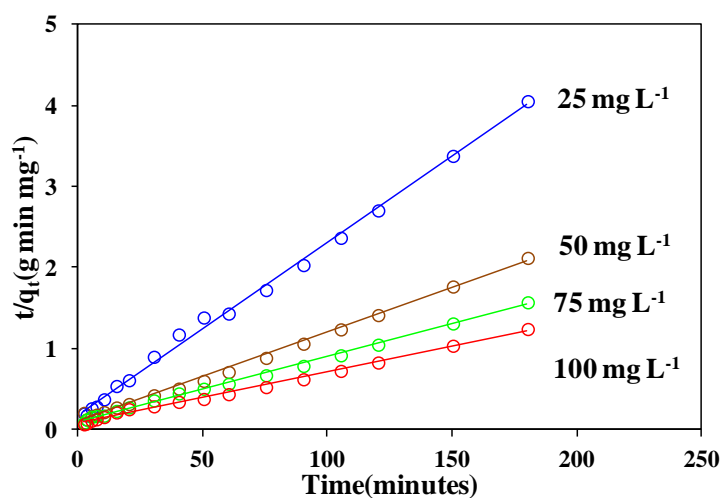

**Figure S2.** PSOR kinetic plots for the confiscation of CV dye onto AISD at varied starting dye concentrations.

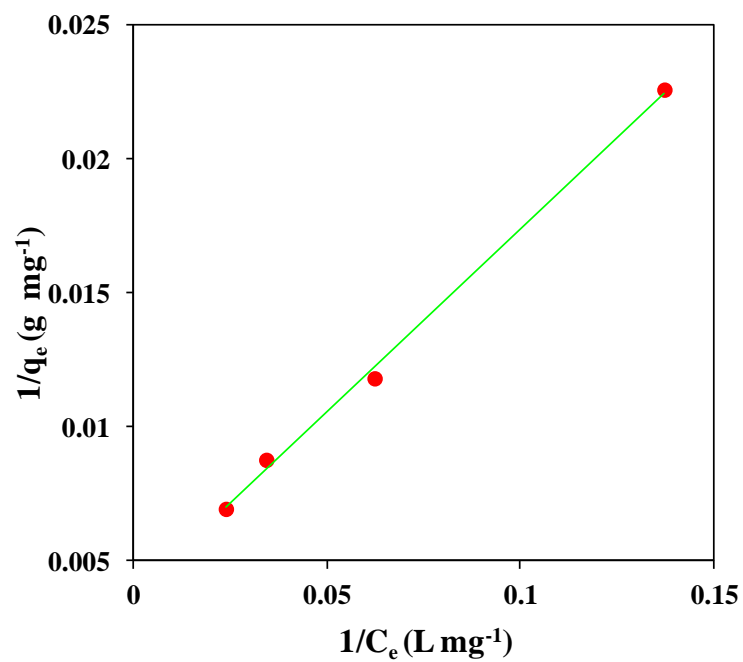

Figure S3. LR adsorption isotherm for CV adsorption onto AISD at 303 K.

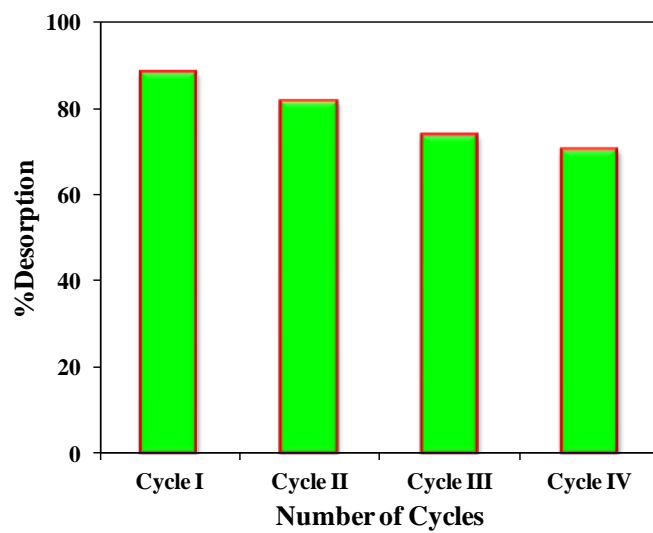

Figure S4. Reusability of AISD for four cycles.

**Table S1.** Linear forms of kinetic, isotherm and thermodynamic equations.

| Model                           | Linear equations                                                                               | Description of model parameters                                                                                                                 |
|---------------------------------|------------------------------------------------------------------------------------------------|-------------------------------------------------------------------------------------------------------------------------------------------------|
| <b>Kinetic models</b>           |                                                                                                |                                                                                                                                                 |
| PFOR                            | $\ln(q_e - q_t) = \ln q_e - K_1 t$                                                             | $K_1$ (min <sup>-1</sup> ) = rate constant                                                                                                      |
| PSOR                            | $\frac{t}{q_t} = \frac{1}{K_2 q_e^2} + \frac{t}{q_e}$                                          | $K_2$ (g min <sup>-1</sup> mg <sup>-1</sup> ) = rate constant                                                                                   |
| EVH                             | $q_t = \frac{\ln(\alpha\beta)}{\beta} + \frac{1}{\beta} \ln t$                                 | $\alpha$ (mg g <sup>-1</sup> min <sup>-1</sup> ) = initial adsorption rate,<br>$\beta$ (g mg <sup>-1</sup> ) = desorption constant              |
| IDN                             | $q_t = K_{id} t^{1/2} + C$                                                                     | $K_{id}$ (mg min <sup>-1/2</sup> g <sup>-1</sup> ) = rate constant                                                                              |
| LDN                             | $\ln(1 - F) = -K_{fd} t + D$                                                                   | $K_{fd}$ (min <sup>-1</sup> ) = rate constant<br>$F = (q_t/q_e)$ = achievement of fractional equilibrium<br>$D$ = constant                      |
| <b>Isotherm models</b>          |                                                                                                |                                                                                                                                                 |
| LR                              | $\frac{1}{q_e} = \frac{1}{q_m K_L C_e} + \frac{1}{q_m}$                                        | $q_m$ (mg g <sup>-1</sup> ) = for complete monolayer coverage adsorption capacity<br>$K_L$ (L mg <sup>-1</sup> ) = Langmuir adsorption constant |
| FH                              | $\ln q_e = \frac{1}{n} \ln C_e + \ln K_F$                                                      | $K_F$ (mg <sup>1-1/n</sup> L <sup>1/n</sup> g <sup>-1</sup> ) = Freundlich constant<br>$n$ = Constant                                           |
| TN                              | $q_e = \frac{RT}{b} \ln C_e + \frac{RT}{b} \ln K_T$                                            | $K_T$ (L g <sup>-1</sup> ) = Temkin isotherm constant<br>$b$ (J mol <sup>-1</sup> ) = Temkin constant                                           |
| <b>Thermodynamics equations</b> |                                                                                                |                                                                                                                                                 |
|                                 | $\Delta G^\circ = -RT \ln K_c$                                                                 | Gibb's free energy ( $\Delta G^\circ$ ) and distribution coefficient( $K_c$ )                                                                   |
|                                 | $\ln K_c = \frac{-\Delta G^\circ}{RT} = \frac{-\Delta H^\circ}{RT} + \frac{\Delta S^\circ}{R}$ | Enthalpy ( $\Delta H^\circ$ ), entropy ( $\Delta S^\circ$ ), and Gas constant(R)                                                                |

**Table S2.** Desorption % of CV from AISD-CV.

| Desorbing agent      | % Desorption |
|----------------------|--------------|
|                      | AISD         |
| HCl                  | 70.25        |
| CH <sub>3</sub> COOH | 36.17        |
| NaOH                 | 7.031        |
| NaCl                 | 5.62         |
| DM-DW                | 1.31         |
